1 **Title**

2 **A Natural History of *NAA15*-related Neurodevelopmental Disorder Through Adolescence**

3 Rikhil Makwana<sup>1</sup>, Carolina Christ<sup>1</sup>, Rahi Patel<sup>1</sup>, Elaine Marchi<sup>1</sup>, Randie Harpell<sup>1</sup>, Gholson J. Lyon<sup>1,2,3\*</sup>

4 <sup>1</sup>Department of Human Genetics, New York State Institute for Basic Research in Developmental  
5 Disabilities, Staten Island, New York, United States of America

6 <sup>2</sup>George A. Jervis Clinic, New York State Institute for Basic Research in Developmental Disabilities,  
7 Staten Island, New York, United States of America

8 <sup>3</sup>Biology PhD Program, The Graduate Center, The City University of New York, New York, United States  
9 of America

10 \* Corresponding author E-mail: [gholsonjlyon@gmail.com](mailto:gholsonjlyon@gmail.com) / [gholson.j.lyon@opwdd.ny.gov](mailto:gholson.j.lyon@opwdd.ny.gov) (GJL)

11 **Abstract**

12 NAA15 is a member of the NatA N-terminal acetyltransferase complex, which also  
13 includes the NAA10 enzymatic sub-unit. Individuals with variants in the *NAA15* coding region  
14 develop *NAA15*-related neurodevelopmental syndrome, which presents with a wide array of  
15 manifestations that affect the heart, brain, musculoskeletal system, and behavioral and cognitive  
16 development. We tracked a cohort of 27 participants (9 females and 18 males) over time, each  
17 with a pathogenic *NAA15* variant, and administered the Vineland-3 assessment to assess their  
18 adaptive functioning. We found that the cohort performed significantly worse compared to the  
19 normalized Vineland values. On average, females performed better than males, and they  
20 performed significantly better on the Motor Domain and Fine Motor Sub-Domain portions of the  
21 assessment. Over time, females showed a decrease in adaptive functioning, with the decline  
22 being especially correlated at the Coping, Domestic, and Fine motor sub-domains. Males (after

23 excluding one outlier) showed a moderate positive correlation between age and ABC standard  
24 score. Ultimately, additional longitudinal data should be collected to determine the validity of the  
25 between sex-differences and to better understand the change in adaptive behavioral outcomes of  
26 individuals with *NAA15*-neurodevelopmental disorder as they age.

## 27 **Introduction**

28 N-terminal acetylation is a prevalent protein modification that involves the addition of an  
29 acetyl group to the alpha-amino group of the N-terminal amino acid of a protein (Aksnes et al.,  
30 2019). This enzymatic process is catalyzed by a group of N-terminal acetyltransferases (NATs)  
31 and plays a pivotal role in various cellular processes, including protein stability, protein-protein  
32 interactions, and cellular localization (Aksnes et al., 2015; Bienvenut et al., 2012; Dikiy &  
33 Eliezer, 2014). There are seven known NAT types, with NatA being the most prominent, believed  
34 to be responsible for modifying 40-50% of the human proteome (Deng et al., 2019; Feng & Ma,  
35 2016; Van Damme, 2021). The NatA complex is composed of the catalytic sub-unit NAA10, and  
36 the auxiliary sub-units NAA15 and HYPK (Deng et al., 2019; Dörfel et al., 2017; Feng et al.,  
37 2016; Knorr et al., 2019; Weidenhausen et al., 2021).

38 Dysregulation of NAA10 and NAA15 expression or activity has been associated with the  
39 pathogenesis of various diseases, including cancer (Kuhns et al., 2018; Le et al., 2023; Zhang et  
40 al., 2020; Zhu et al., 2024), neurodevelopmental disorders (Cheng et al., 2018; Lyon et al., 2023;  
41 Makwana et al., 2024; Sidhu et al., 2017; Wu & Lyon, 2018), and cardiovascular diseases  
42 (Belbachir et al., 2023; Huth et al., 2023; Ritter et al., 2021; Støve et al., 2018; Ward et al.,  
43 2021). More notably, mutations in the X-linked gene *NAA10* lead to Ogden Syndrome, which has  
44 numerous effects on an individual's development and overall health. *NAA15*-related  
45 neurodevelopmental syndrome has overlapping symptoms with Ogden Syndrome, including

46 intellectual disability, atypical or delayed development, heart anomalies, and more features  
47 previously described, though patients with *NAA15* variants typically have milder phenotypes  
48 (Cheng et al., 2020; Dörfel & Lyon, 2015; Lyon et al., 2023; McTiernan et al., 2018; Myklebust  
49 et al., 2015; Patel et al., 2024; Pesz et al., 2018; Stessman et al., 2017; Støve et al., 2018; Umlai  
50 et al., 2021; Wong et al., 2019; Zhao et al., 2018). Additionally, *NAA15* variants are associated  
51 with musculoskeletal and neuromuscular abnormalities that can appear in childhood or may have  
52 a delayed appearance until adulthood (Danti et al., 2024; Monestier et al., 2019; Pesz et al., 2018;  
53 Tian et al., 2022; Yubero et al., 2022).

54 The aim of the current study is to further describe adaptive functioning in individuals  
55 with *NAA15*-related neurodevelopmental syndrome by analyzing prospective data to understand  
56 how this disorder progresses over time.

## 57 **Methods**

### 58 Participants

59 All families that participated in the investigation signed Institutional Review Board  
60 (IRB)-approved consents and HIPAA forms. The scope of the project was explained in lay  
61 language. The participant population included children with *NAA15* pathogenic variants that the  
62 principal investigator has previously worked with for other research projects. Participants were  
63 not compensated for their time. Overall, there were 27 families who were administered the  
64 assessment. Probands were assigned *NAA15*-XXX designations based on an internal registry  
65 known only to the researchers to ensure anonymity and confidentiality while allowing unique  
66 probands to be tracked in the literature.

### 67 Cognitive Assessment

68           The parents of the participants were administered Vineland-3 which is composed of three  
69 core domains: Communication Daily Living Skills, and Socialization. These domains are further  
70 split into sub-domains that are used to assess an individual's competency in tasks of personal and  
71 social sufficiency (Perry et al., 2009). The scores for each core domain are norm referenced and  
72 summed to generate an Adaptive Behavior composite (ABC) score that provides a holistic  
73 picture of an individual's adaptive behavior across domains. The Vineland-3 tools were  
74 administered by three trained assessors at various timepoints in the participants' lives, ranging  
75 from 1-23 years old. Individual assessor scores were cross validated with one another to ensure  
76 equivalency in assessment administration and scoring. Participant caregivers were those  
77 interviewed due to their proximity to and knowledge of the patients. Participants were given  
78 access to the Vineland assessment scores after they were generated.

## 79 Analysis

80           The Principal Investigator and associated staff collected at least one Vineland-3 score for  
81 each participant over multiple years. Some participants were able to take the assessment more  
82 than once, thereby providing a longitudinal outlook. Natural history analysis and visualization  
83 was then performed using the GraphPad Prism software. All pathogenic variants were analyzed  
84 together and graphed by comparing their ABC standard score against the age at time of  
85 assessment. Further analysis was performed by filtering graphs by sex. All pathogenic variants,  
86 male participants, and female participants were also graphed according to their Communication  
87 (com), Daily Living Skills (dls), Social (soc), and Motor (mot) domain standard scores. The  
88 domain scores were further broken down into sub-domain standard scores to allow for more  
89 granular identification of participant strength and weakness over time. The Communication sub-  
90 domain scores were Receptive (rec), Expressive (exp), and Written (wrn). The Daily Living

91 Skills sub-domains analyzed were Personal (per), Domestic (dom), and Community (cmm). The  
92 Socialization sub-domains of interest were Interpersonal Relationships (ipr), Play and Leisure  
93 (pla), and Coping Skills (cop). The Motor sub-domains of Interest were Fine Motor (fmo) and  
94 Gross Motor (gmo). Scores were only collected and included for this motor domain if patients  
95 were under the age of nine to stay within the validated age range of the exam (Perry et al., 2009),  
96 although it is possible to score older patients, just keeping this limitation in mind. Lastly, the  
97 Internalizing (int) and Externalizing (ext) sub-domain components of the Maladaptive Trait  
98 domain were also included in analysis, however the Critical Items component of the domain  
99 were not.

100 The scores were compared in Microsoft Excel with two-tailed equal variance t-tests to  
101 compare the adaptive behavior outcomes between males and females to determine if there were  
102 sex differences. The p-value was set at .05 for all calculations. Correlation coefficients were also  
103 calculated for each of the graphs made using Excel. A second round of calculations for the t-test  
104 and the correlation coefficients in the male cohort was performed to exclude NAA15-010 due to  
105 being three standard deviations above the mean in age compared to the other participants and  
106 having performed two standard deviations below the mean in Vineland ABC, Motor, Social, and  
107 Daily Living Skills standard scores. Data presented in tables includes calculations performed  
108 including NAA15-010 unless otherwise specified. The Vineland manual also provides Domain  
109 and ABC standard score ranges that correspond to adaptive behavior functioning level. “High  
110 functioning” individuals score between 130-140, “moderately high” between 115-129,  
111 “adequately” between 86-114, “moderately low” between 71-85, and “low functioning” less than  
112 70. We clustered participants based off their scores and performed chi square statistics to

113 determine if there was a further differentiation that could be made between the male and female  
114 cohort in how they function.

## 115 **Results**

116 There were 27 participants who were administered the Vineland and included in this  
117 study. A breakdown of the different pathogenic variants in each sex can be seen in **Table 1**. In  
118 this cohort, there were 26 unique pathogenic variants identified. 25 of these variants were only  
119 present in one proband each. The p.His080Argfs\*17 variant was present in two unrelated  
120 probands. Twenty-five participants developed their variant *de novo* and 2 participants have  
121 variants of unknown origin (due to the parents not being tested). Of the 27 participants, 9 are  
122 female and 18 are male with ages ranging from 1 year to 24.5 years (mean = 9.0 years, standard  
123 deviation (SD) = 5.2).

124 Compared to the general population, individuals with *NAA15* variants scored below  
125 average on the Vineland-3 Assessment (where average is mean=100, sd=15). This was true for  
126 ABC standard scores as well as the main domain scores. The average ABC score among *NAA15*  
127 variants was 68.5 (SD = 22.1). Females tended to outperform males across adaptive behavior  
128 domains. However, except for the Motor domain score, these differences were not statistically  
129 significant. A summary of the Vineland 3 scores can be seen in **Table 2**.

130 Graphical representations of the ABC standard scores over time can be seen in **Figure 1**.  
131 Before stratifying by sex, there appears to be an overall downward trend in score with age.  
132 **Figure 2** shows the ABC standard scores separated by male and female. Separation by sex shows  
133 a moderate linear increase in adaptive function in males over time, when excluding NAA15-010,  
134 whereas females appear to show a moderate linear decay. There is also a moderate linear decay

135 in the female Daily Living Skills domain over times whereas the males showed a moderate  
136 positive linear growth when excluding NAA15-010. **Table 3** showcases the remaining calculated  
137 correlation coefficient values for the Vineland ABC and Domain standard scores for the females,  
138 males, and males excluding NAA15-010.

139 The Communication, Daily Living Skills, Social, and Motor standard score graphs can be  
140 seen in **Figure 3** and follow similar trends for females and males, when excluding NAA15-010,  
141 to the ABC scores over time. It should be noted that excluding NAA15-010 did not significantly  
142 change the t-test statistics of the standard scores when comparing the males and the females. The  
143 magnitude at which the females outperformed the males decreased. However, except for the  
144 Motor domain score, their differences were still not significant.

145 Dividing the Motor domain into its Fine Motor and Gross Motor sub-domains elucidated  
146 the difference between sexes. Males, with and without the inclusion of NAA15-010, scored 7.8  
147 (SD = 3.2) on average on the Fine Motor subdomain component of the Vineland. This is  
148 significantly less than the females, who had an average score of 13.3 (SD = 3.5,  $p = .001$ ). On  
149 average for Gross Motor subdomain scores, males (mean = 8.5, SD = 4.0) also performed worse  
150 than their female counterparts (mean = 10.4, SD = 2.2), although this difference was not  
151 statistically significant. There were no other significant differences between how the sexes  
152 performed in the various sub-domains. A summary of the breakdown of each domain into its sub-  
153 domain components can be seen in **Table 4**.

154 Each domain sub-domain score can be seen in **Figure 4**. The strongest negative linear  
155 associations exist between the Coping, Fine Motor, and Domestic sub-domains over time in the  
156 females with *NAA15* variants. There are also moderately strong negative linear associations in  
157 the Receptive and Personal sub domains. The correlation coefficients in the males were not as

158 strong as those in the females. However, when excluding NAA15-010, the Personal sub-domain  
159 had a moderate positive linear relationship over time. Calculated correlation coefficients for each  
160 sub-domain can be seen in **Table 5**.

161 Categorical analysis based on the Vineland manual category designations can be found in  
162 **Table 6**, comparing males versus females. There was a significant difference between males and  
163 females for performance on the Motor domain ( $p = .02$ ). The remaining comparisons were not  
164 significant.

165 According to NAA15-010's caregiver, they were diagnosed with focal seizures in early  
166 adolescence (**Supplemental 1**). In conjunction to the focal seizure diagnosis, the patient  
167 developed catatonia after chronic mold exposure leading to a leading diagnosis of Pediatric  
168 Acute-onset Neuropsychiatric Syndrome (PANS) (Gagliano et al., 2023). The caregivers ordered  
169 independent mold testing of their residence (**Supplemental 2**) and a urine fungal toxin panel  
170 (**Supplemental 3**) in hopes of providing additional evidence to support the diagnosis. According  
171 to the fungal toxin panel, the levels of gliotoxin and trichothecene were present in the 50<sup>th</sup>-99<sup>th</sup>  
172 percentile. While the lab did not reference the range at which the percentiles were set, gliotoxin  
173 is associated with *Aspergillus* and trichothecene with *Fusarium* (Janik et al., 2021; Ye et al.,  
174 2021). The lack of treatment received for their PANS-associated catatonia over an approximately  
175 ten-year period is NAA15-010's caregiver's explanation for their stark decrease in function  
176 (**Supplemental 1**).

177 NAA15-034, in contrast to NAA15-010, performed better on the Vineland-3 assessments  
178 compared to the rest of the tested cohort. NAA15-034 did not have childhood exposure to mold  
179 or other toxins, according to caregiver reports, but does have a history of hyperbaric oxygen  
180 therapy (HBOT) (two sessions daily) that was started on the recommendation of clinicians who



181 believed the proband had intellectual disability with static encephalopathy or possibly a  
182 mitochondrial disease. NAA15-034 had her first session at before the age of 2 years, at which  
183 time she was, according to correspondence with the caregivers, one year behind  
184 developmentally, being unable to crawl or support weight on her legs. On day 4, after the 8th  
185 session, NAA15-034 crawled and was able to bear weight on her legs for the first time. NAA15-  
186 034 continued to have HBOT sessions until around 5 years old. At that time, she had caught up  
187 developmentally with their peer group. Further information regarding NAA15-034, and their  
188 disease progression and associated symptoms, is currently being written up in a case report  
189 highlighting their progress with HBOT.

190

## 191 **Discussion**

192 Individuals with *NAA15*-related neurodevelopmental syndrome performed significantly  
193 worse than the mean on the Vineland-3. This difference was expected, as the expression of the  
194 NatA complex is ubiquitous across tissue types and plays a prominent role in development  
195 (Cheng et al., 2020; Liszczak et al., 2013; Lyon et al., 2023). However, individuals with *NAA15*  
196 variants (n=27, mean=68.5) perform significantly better, on average, than individuals with  
197 *NAA10* variants (n=58, ABC mean=40.4) (Makwana et al., 2024). NAA10 is the catalytic subunit  
198 of the NatA complex where NAA15 is an auxiliary subunit. In the presence of NAA15, NAA10  
199 localizes to the ribosome and preferentially acetylates N-termini Ser, Ala, Thr, Val, and Gly  
200 (Arnesen et al., 2005; Park & Szostak, 1992). In the absence of NAA15, NAA10 has been shown  
201 to acetylate acidic N-termini residues and localize to the cytoplasm suggesting additional  
202 function independent of the NatA complex (Liszczak et al., 2013; Van Damme et al., 2011).  
203 NAA10 has also been shown *in vitro* to affect dendritic arborization, such that both over and

204 under expression of the protein leads to abnormal dendritic development (Chou et al., 2024;  
205 Ohkawa et al., 2008). Animal models have shown that abnormalities in dendritic arborization  
206 during development can lead to Autism Spectrum Disorder-like behavior suggesting NAA10  
207 specifically may play an even larger role in cognitive development by itself than as part of the  
208 NatA complex (Barón-Mendoza et al., 2021; Martínez-Cerdeño, 2017). Given the greater  
209 functional significance of a working NAA10 protein, it stands to reason that *NAA10* related  
210 neurodevelopmental syndrome would have a more severe presentation than that of *NAA15*  
211 related neurodevelopmental syndrome.

212         When comparing performance by sex, the females with *NAA15* variants, on average,  
213 performed better than the males. Except for two participants with an unknown inheritance  
214 pattern, all *NAA15* pathogenic variants in this cohort occurred *de novo*. The difference in sex is  
215 unexpected, however, it could be due to small sample sizes. Additionally, given that 23 out of 25  
216 pathogenic variants in this cohort are unique (**Table 1**), it was not possible to assess whether the  
217 differences between sexes are significant at a genotype level. Further research with a larger  
218 cohort should be conducted to identify recurrent pathogenic variants and their impacts, if any, on  
219 functional and cognitive outcomes.

220         While females performed, on average, better than males across all adaptive domains, they  
221 performed significantly better on the motor domain and fine motor sub-domain portions of the  
222 Vineland. Pathogenic variants in *NAA15* have been associated with infant onset dystonia in a few  
223 individuals (Cheng et al., 2018; Danti et al., 2024; Lyon et al., 2023; Yubero et al., 2022), which  
224 could be one reason why the cohort performed worse on motor tasks compared to the norm  
225 population. However, there did not appear to be a difference in the presentation of  
226 musculoskeletal manifestations between the sexes in the referenced literature. Furthermore, there

227 is a case where an *NAA15* variant led to adult-onset parkinsonism in a man presenting with other  
228 manifestations of *NAA15*-related neurodevelopmental syndrome, such as speech delay and  
229 intellectual disability (Straka et al., 2022). Continued genetic testing of individuals with adult-  
230 onset dystonia and longitudinal monitoring of the current cohort for motor disorders would be  
231 necessary to help determine if the difference in motor function between male and females is due  
232 to chance, sex differences, or pathogenic variant type.

233 In aggregate, it is difficult to determine if there is an overall increase or decrease in  
234 function over time in the participants. However, when comparing performance by sex, there is a  
235 negative correlation between adaptive behavior in females and age. The decline with age has the  
236 strongest correlation between the coping, domestic, and fine motor sub-domains. With a decline  
237 in fine motor capacity, it would stand to reason that an individual's ability to take care of oneself  
238 (domestic) would also decline. However, both the domestic and fine motor sub-domains have  
239 age restrictions leading to unequal administration of those portions of the exam creating an even  
240 smaller population size to compare from (Farmer et al., 2020; Perry et al., 2009, p. 3).  
241 Furthermore, this decline in function contradicts the mild recovery in gross motor, personal-  
242 social, and language development function previously reported in the literature (Cheng et al.,  
243 2018, 2020; Tian et al., 2022). However, some previous reports of mild functional recovery, such  
244 as that by Tian et al. in 2022, were limited by small sample size (n=4). This study also used the  
245 Children Neuropsychological and Behavior Scale-Revision (CNBS-R2016) and Ages and Stages  
246 Questionnaires (ASQ), rather than Vineland-3, making direct comparisons more difficult. The  
247 decline in the coping sub-domain in the females could also be partially explained by the decrease  
248 in motor skills, as there is evidence that similar motor declines in those with Autism Spectrum  
249 Disorder (ASD) have led to decreased coping and socialization skills overall (Peyre et al., 2024;

250 Raditha et al., 2023). Additionally, several patients in this cohort ranged from ages 11 to 17, a  
251 time period that is traditionally tumultuous for adolescents due to various physical and hormonal  
252 changes, and is associated with increased stress for those with ASD (Cridland et al., 2014;  
253 Steward et al., 2018; Tager-Flusberg & Kasari, 2013). Ultimately, follow up studies need to be  
254 performed on this cohort to determine if they are continuing to show decline over time, if there is  
255 a bottoming-out effect, or if they begin to improve after navigating adolescence.

256 In contrast to the female decline over time, males when analyzed without NAA15-010  
257 have a moderate increase in adaptive function with age. However, there are not strong  
258 correlations present in any subsequent sub-domain analysis performed. Additionally, when  
259 including NAA15-010, there were no or small correlations between Vineland score and age.

260 NAA15-010 was removed from the analysis due to their having performed much worse  
261 than the rest of their cohort. One explanation for their decreased performance could be due to  
262 their focal seizures as there is evidence suggesting adolescent onset seizures are associated with  
263 nonspecific neurodevelopmental declines (Dreier et al., 2019; Nickels et al., 2016). Another  
264 explanation for the decrease in performance could be the presence of *Aspergillus* and *Fusarium*  
265 in the proband's urine. Various case reports have suggested that there is a link between the  
266 presence of *Aspergillus* and Autism Spectrum Disorder (Baker & Shaw, 2020; Markova, 2019)  
267 and schizophrenia (Bettoni et al., 1984). Thus, while there are no reported cases of PANS  
268 associated with *Aspergillus* colonization, the diagnosis could explain both the proband's  
269 catatonia and decline (Rogers et al., 2019). This once again highlights that the trajectory of any  
270 genetic disease, including "Mendelian" ones, can be dramatically altered by environmental, other  
271 genetic, or stochastic influences (Lyon & O'Rawe, 2015, pp. 289–318).

272           Despite NAA15-010 and NAA15-034 being two of the oldest probands in the cohort,  
273 NAA15-034 markedly outperformed NAA15-010 across Vineland domains. They also  
274 performed markedly better than the rest of the study cohort. An explanation for this could be the  
275 multiple HBOT sessions NAA15-034 underwent throughout development. HBOT is clinically  
276 indicated for various conditions such as gas emboli, thermal burn injury, carbon monoxide  
277 poisoning, and central retinal artery occlusion among others (Ortega et al., 2021). The therapy  
278 acts to increase angiogenesis and wound healing, exerts antimicrobial effects, and helps rapidly  
279 alter circulating O<sub>2</sub> levels (Ortega et al., 2021). HBOT also has some theoretical indications for  
280 use in cancer treatment (Lu et al., 2019; Thews & Vaupel, 2015), immune modulation (Novak et  
281 al., 2016; Resanovic et al., 2019), and as a neuroprotective agent (Chazalviel et al., 2016; Zhou  
282 et al., 2016). A clinical trial has shown that HBOT may have some efficacy in improving  
283 symptoms in pediatric post-concussive syndrome (Hadanny et al., 2022). Multiple trials,  
284 however, have shown little evidence for HBOT in improving adaptive behavior in autism  
285 spectrum disorder (ASD) (Bent et al., 2012; El-Tellawy et al., 2022; Sampanthavivat et al.,  
286 2012). NAA15-related neurodevelopmental disorder presents with similar behavioral deficits to  
287 ASD, but has a known genetic deficit whereas ASD represents a spectrum of different etiologies  
288 leading to a similar over-arching cognitive phenotype. This difference may explain the lack of  
289 HBOT effect in traditional ASD cohorts. Future work could consider treating any NAA15 mouse  
290 models with HBOT to better understand the mechanism of effect and to identify an initial safety  
291 profile.

292           The overall decrease in female adaptive behavior scores and the overall significantly  
293 decreased male adaptive scores suggest that there is an urgent need for additional studies and  
294 development of interventions for *NAA15*-related neurodevelopmental disorder. Future research

295 should aim to complete the clinical timeline as best as possible. The present cohort only included  
296 individuals up to the age of 25 due to the rarity of the disease. Without insights into the later  
297 stages of the disorder, it is more difficult for clinicians to guide caregivers on what to expect at  
298 different stages of a patient's life.

299 *NAA15*-related neurodevelopmental disorder is thought to be caused by  
300 haploinsufficiency (Cheng et al., 2018; Tian et al., 2022). For this mechanism of disease, there  
301 are several therapies in development that show promise in cell lines and animal models in similar  
302 disorders, such as Rett Syndrome and Angelman Syndrome, to help restore protein function and  
303 dosage to adequate levels (Albadri et al., 2017; Burbano et al., 2022; Hill & Meisler, 2021;  
304 Milazzo et al., 2021; Palmieri et al., 2023; Protic et al., 2019). More recently, a case of hereditary  
305 spastic paraplegia type 50 was treated with intrathecal delivery of an AAV9 encoded viral vector.  
306 Investment in similar interventions for *NAA15*-related neurodevelopmental syndrome, if  
307 implemented early enough, may restore protein function and restore adaptive behavior  
308 functioning in affected patients (Dowling et al., 2024).

### 309 **Conclusion**

310 *NAA15*-related neurodevelopmental disorder is closely related to Ogden Syndrome  
311 (*NAA10*-related neurodevelopmental disorder), as both the *NAA15* and *NAA10* proteins are part  
312 of the NatA complex. *NAA15* plays a supporting role by helping to bring the complex to the  
313 ribosome, with dysfunction leading to clinical manifestations in the heart, musculoskeletal  
314 system, and brain. The pathogenic variants in *NAA15*-related neurodevelopmental disorder are  
315 heterozygous, so there is still one functioning copy of *NAA15*, meaning that the NatA complex  
316 can still form, but likely with haploinsufficiency. As such, *NAA15* pathogenic variants usually  
317 present less severely than those with pathogenic *NAA10* variants. Repeated Vineland-3

318 administration to a cohort of 27 patients with unique *de novo* NAA15 pathogenic variants has  
319 revealed the natural history of the disease, showcasing an overall decrease in adaptive  
320 functioning compared to the norm from infancy till adolescence. Females tended to perform on  
321 average better than males. However, over time, females showed a decline in function whereas  
322 males showed an increase. Additional natural history studies need to be performed to understand  
323 disease outcomes outside of adolescence, difference between sexes, and to identify outliers who  
324 perform significantly better or worse than their peers, so genetic or environmental factors  
325 influencing disease can be identified.

## 326 **Supplemental Information**

### 327 **S1. NAA15-010 Caregiver Report**

### 328 **S2. Anonymized Mold Report**

### 329 **S3. Anonymized Fungal Toxin Report**

330

## 331 **Author Contributions**

332 GJL and RH conducted all virtual interviews with participants and were responsible for  
333 primary Vineland data collection, with data curation conducted by EM. RM and CC were  
334 responsible for data analysis and project conception, along with GJL. The first draft of the  
335 manuscript was written by RM and CC, with critical revision performed by GJL and RP at  
336 several points.

## 337 **Acknowledgments**

338 We thank the families and the foundation, Ogden CARES for their participation and support. We  
339 thank Ellen Israel for assistance with data collection early on in the project.

340

#### 341 **Ethical Approval**

342 Both oral and written patient consent were obtained for research and publication, with  
343 approval of protocol #7659 for the Jervis Clinic by the New York State Psychiatric Institute  
344 Institutional Review Board.

345

#### 346 **Competing Interests**

347 The authors declare that they have no competing interests or personal relationships that  
348 could have influenced the work reported in this paper.

349

#### 350 **Data Availability**

351 All data are deidentified to protect patient privacy, and the underlying data cannot be  
352 shared due to these same privacy restrictions.

353

#### 354 **Funding**

355 This work is supported by New York State Office for People with Developmental  
356 Disabilities (OPWDD) and NIH NIGMS R35-GM-133408.

357

#### 358 **References**



- 359 Aksnes, H., Hole, K., & Arnesen, T. (2015). Molecular, cellular, and physiological significance of  
360 N-terminal acetylation. *International Review of Cell and Molecular Biology*, 316, 267–  
361 305. <https://doi.org/10.1016/bs.ircmb.2015.01.001>
- 362 Aksnes, H., Ree, R., & Arnesen, T. (2019). Cotranslational, Posttranslational, and Noncatalytic  
363 Roles of N-terminal Acetyltransferases. *Molecular Cell*, 73(6), 1097–1114.  
364 <https://doi.org/10.1016/j.molcel.2019.02.007>
- 365 Albadri, S., Del Bene, F., & Revenu, C. (2017). Genome editing using CRISPR/Cas9-based  
366 knock-in approaches in zebrafish. *Methods (San Diego, Calif.)*, 121–122, 77–85.  
367 <https://doi.org/10.1016/j.ymeth.2017.03.005>
- 368 Arnesen, T., Anderson, D., Baldersheim, C., Lanotte, M., Varhaug, J. E., & Lillehaug, J. R.  
369 (2005). Identification and characterization of the human ARD1–NATH protein  
370 acetyltransferase complex. *Biochemical Journal*, 386(Pt 3), 433–443.  
371 <https://doi.org/10.1042/BJ20041071>
- 372 Baker, S., & Shaw, W. (2020). Case Study: Rapid Complete Recovery From An Autism  
373 Spectrum Disorder After Treatment of Aspergillus With The Antifungal Drugs  
374 Itraconazole And Sporanox. *Integrative Medicine: A Clinician's Journal*, 19(4), 20–27.
- 375 Barón-Mendoza, I., Maqueda-Martínez, E., Martínez-Marcial, M., De la Fuente-Granada, M.,  
376 Gómez-Chavarin, M., & González-Arenas, A. (2021). Changes in the Number and  
377 Morphology of Dendritic Spines in the Hippocampus and Prefrontal Cortex of the C58/J  
378 Mouse Model of Autism. *Frontiers in Cellular Neuroscience*, 15.  
379 <https://doi.org/10.3389/fncel.2021.726501>
- 380 Belbachir, N., Wu, Y., Shen, M., Zhang, S. L., Zhang, J. Z., Liu, C., Knollmann, B. C., Lyon, G.  
381 J., Ma, N., & Wu, J. C. (2023). Studying Long QT Syndrome Caused by NAA10 Genetic  
382 Variants Using Patient-Derived Induced Pluripotent Stem Cells. *Circulation*, 148(20),  
383 1598–1601. <https://doi.org/10.1161/CIRCULATIONAHA.122.061864>

- 384 Bent, S., Bertoglio, K., Ashwood, P., Nemeth, E., & Hendren, R. L. (2012). Brief report:  
385 Hyperbaric oxygen therapy (HBOT) in children with autism spectrum disorder: a clinical  
386 trial. *Journal of Autism and Developmental Disorders*, 42(6), 1127–1132.  
387 <https://doi.org/10.1007/s10803-011-1337-3>
- 388 Bettoni, L., Gabrielli, M., Lechi, A., Tedeschi, F., & Trabattoni, G. (1984). Cerebral mycosis:  
389 Clinico-pathological report of four cases observed in fifteen months. *Italian Journal of*  
390 *Neurological Sciences*, 5(4), 437–443. <https://doi.org/10.1007/BF02042629>
- 391 Bienvenut, W. V., Sumpton, D., Martinez, A., Lilla, S., Espagne, C., Meinnel, T., & Giglione, C.  
392 (2012). Comparative large scale characterization of plant versus mammal proteins  
393 reveals similar and idiosyncratic N- $\alpha$ -acetylation features. *Molecular & Cellular*  
394 *Proteomics: MCP*, 11(6), M111.015131. <https://doi.org/10.1074/mcp.M111.015131>
- 395 Burbano, L. E., Li, M., Jancovski, N., Jafar-Nejad, P., Richards, K., Sedo, A., Soriano, A., Rollo,  
396 B., Jia, L., Gazina, E. V., Piltz, S., Adikusuma, F., Thomas, P. Q., Kopsidas, H., Rigo, F.,  
397 Reid, C. A., Maljevic, S., & Petrou, S. (2022). Antisense oligonucleotide therapy for  
398 KCNT1 encephalopathy. *JCI Insight*, 7(23), e146090.  
399 <https://doi.org/10.1172/jci.insight.146090>
- 400 Chazalviel, L., Haelewyn, B., Degoulet, M., Blatteau, J.-E., Vallée, N., Risso, J.-J., Besnard, S.,  
401 & Abraini, J. H. (2016). Hyperbaric oxygen increases tissue-plasminogen activator-  
402 induced thrombolysis in vitro, and reduces ischemic brain damage and edema in rats  
403 subjected to thromboembolic brain ischemia. *Medical Gas Research*, 6(2), 64–69.  
404 <https://doi.org/10.4103/2045-9912.184713>
- 405 Cheng, H., Dharmadhikari, A. V., Varland, S., Ma, N., Domingo, D., Kleyner, R., Rope, A. F.,  
406 Yoon, M., Stray-Pedersen, A., Posey, J. E., Crews, S. R., Eldomery, M. K., Akdemir, Z.  
407 C., Lewis, A. M., Sutton, V. R., Rosenfeld, J. A., Conboy, E., Agre, K., Xia, F., ... Lyon, G.  
408 J. (2018). Truncating Variants in NAA15 Are Associated with Variable Levels of

- 409 Intellectual Disability, Autism Spectrum Disorder, and Congenital Anomalies. *American*  
410 *Journal of Human Genetics*, 102(5), 985–994. <https://doi.org/10.1016/j.ajhg.2018.03.004>
- 411 Cheng, H., Gottlieb, L., Marchi, E., Kleyner, R., Bhardwaj, P., Rope, A. F., Rosenheck, S.,  
412 Moutton, S., Philippe, C., Eyaid, W., Alkuraya, F. S., Toribio, J., Mena, R., Prada, C. E.,  
413 Stessman, H., Bernier, R., Wermuth, M., Kauffmann, B., Blaumeiser, B., ... Lyon, G. J.  
414 (2020). Phenotypic and biochemical analysis of an international cohort of individuals with  
415 variants in NAA10 and NAA15. *Human Molecular Genetics*, 29(5), 877–878.  
416 <https://doi.org/10.1093/hmg/ddz173>
- 417 Chou, C.-T., Kang, M.-L., Lee, C.-C., Hsu, P.-H., & Juan, L.-J. (2024). *Naa10 regulates*  
418 *hippocampal neurite outgrowth via Btd3 N-α-acetylation-mediated actin dynamics* (p.  
419 2024.05.09.583166). bioRxiv. <https://doi.org/10.1101/2024.05.09.583166>
- 420 Cridland, E. K., Jones, S. C., Caputi, P., & Magee, C. A. (2014). Being a girl in a boys' world:  
421 Investigating the experiences of girls with autism spectrum disorders during  
422 adolescence. *Journal of Autism and Developmental Disorders*, 44(6), 1261–1274.  
423 <https://doi.org/10.1007/s10803-013-1985-6>
- 424 Danti, F. R., Sarmiento, I. J. K., Moloney, P. B., Colangelo, I., Graziola, F., Garavaglia, B., Zorzi,  
425 G., Mencacci, N. E., & Lubbe, S. J. (2024). Childhood-Onset Lower Limb Focal Dystonia  
426 Due to a NAA15 Variant: A Case Report. *Movement Disorders: Official Journal of the*  
427 *Movement Disorder Society*. <https://doi.org/10.1002/mds.29732>
- 428 Deng, S., Magin, R. S., Wei, X., Pan, B., Petersson, E. J., & Marmorstein, R. (2019). Structure  
429 and Mechanism of Acetylation by the N-Terminal Dual Enzyme NatA/Naa50 Complex.  
430 *Structure (London, England: 1993)*, 27(7), 1057-1070.e4.  
431 <https://doi.org/10.1016/j.str.2019.04.014>
- 432 Dikiy, I., & Eliezer, D. (2014). N-terminal Acetylation Stabilizes N-terminal Helicity in Lipid- and  
433 Micelle-bound α-Synuclein and Increases Its Affinity for Physiological Membranes.

- 434 *Journal of Biological Chemistry*, 289(6), 3652–3665.
- 435 <https://doi.org/10.1074/jbc.M113.512459>
- 436 Dörfel, M. J., Fang, H., Crain, J., Klingener, M., Weiser, J., & Lyon, G. J. (2017). Proteomic and  
437 genomic characterization of a yeast model for Ogden syndrome. *Yeast (Chichester,*  
438 *England)*, 34(1), 19–37. <https://doi.org/10.1002/yea.3211>
- 439 Dörfel, M. J., & Lyon, G. J. (2015). The biological functions of Naa10—From amino-terminal  
440 acetylation to human disease. *Gene*, 567(2), 103–131.  
441 <https://doi.org/10.1016/j.gene.2015.04.085>
- 442 Dowling, J. J., Pirovolakis, T., Devakandan, K., Stosic, A., Pidsadny, M., Nigro, E., Sahin, M.,  
443 Ebrahimi-Fakhari, D., Messahel, S., Varadarajan, G., Greenberg, B. M., Chen, X.,  
444 Minassian, B. A., Cohn, R., Bonnemann, C. G., & Gray, S. J. (2024). AAV gene therapy  
445 for hereditary spastic paraplegia type 50: A phase 1 trial in a single patient. *Nature*  
446 *Medicine*, 1–6. <https://doi.org/10.1038/s41591-024-03078-4>
- 447 Dreier, J. W., Pedersen, C. B., Cotsapas, C., & Christensen, J. (2019). Childhood seizures and  
448 risk of psychiatric disorders in adolescence and early adulthood: A Danish nationwide  
449 cohort study. *The Lancet Child & Adolescent Health*, 3(2), 99–108.  
450 [https://doi.org/10.1016/S2352-4642\(18\)30351-1](https://doi.org/10.1016/S2352-4642(18)30351-1)
- 451 El-Tellawy, M. M., Ahmad, A. R., Saad, K., Alruwaili, T. A. M., AbdelMoneim, I. M., Shaaban, I.,  
452 Alinad, A. K. M., Albulayhid, S. B. H., & Khalaf, S. M. (2022). Effect of hyperbaric oxygen  
453 therapy and Tomatis sound therapy in children with autism spectrum disorder. *Progress*  
454 *in Neuro-Psychopharmacology & Biological Psychiatry*, 113, 110457.  
455 <https://doi.org/10.1016/j.pnpbp.2021.110457>
- 456 Farmer, C., Adedipe, D., Bal, V. H., Chlebowski, C., & Thurm, A. (2020). Concordance of the  
457 Vineland Adaptive Behavior Scales, second and third editions. *Journal of Intellectual*  
458 *Disability Research: JIDR*, 64(1), 18–26. <https://doi.org/10.1111/jir.12691>

- 459 Feng, J., Li, R., Yu, J., Ma, S., Wu, C., Li, Y., Cao, Y., & Ma, L. (2016). Protein N-terminal  
460 acetylation is required for embryogenesis in Arabidopsis. *Journal of Experimental*  
461 *Botany*, 67(15), 4779–4789. <https://doi.org/10.1093/jxb/erw257>
- 462 Feng, J., & Ma, L. (2016). NatA is required for suspensor development in Arabidopsis. *Plant*  
463 *Signaling & Behavior*, 11(10), e1231293.  
464 <https://doi.org/10.1080/15592324.2016.1231293>
- 465 Gagliano, A., Carta, A., Tanca, M. G., & Sotgiu, S. (2023). Pediatric Acute-Onset  
466 Neuropsychiatric Syndrome: Current Perspectives. *Neuropsychiatric Disease and*  
467 *Treatment*, 19, 1221–1250. <https://doi.org/10.2147/NDT.S362202>
- 468 Hadanny, A., Catalogna, M., Yaniv, S., Stolar, O., Rothstein, L., Shabi, A., Suzin, G., Sasson, E.,  
469 Lang, E., Finci, S., Polak, N., Fishlev, G., Harpaz, R. T., Adler, M., Goldman, R.-E.,  
470 Zemel, Y., Bechor, Y., & Efrati, S. (2022). Hyperbaric oxygen therapy in children with  
471 post-concussion syndrome improves cognitive and behavioral function: A randomized  
472 controlled trial. *Scientific Reports*, 12(1), 15233. [https://doi.org/10.1038/s41598-022-](https://doi.org/10.1038/s41598-022-19395-y)  
473 [19395-y](https://doi.org/10.1038/s41598-022-19395-y)
- 474 Hill, S. F., & Meisler, M. H. (2021). Antisense Oligonucleotide Therapy for Neurodevelopmental  
475 Disorders. *Developmental Neuroscience*, 43(3–4), 247–252.  
476 <https://doi.org/10.1159/000517686>
- 477 Huth, E. A., Zhao, X., Owen, N., Luna, P. N., Vogel, I., Dorf, I. L. H., Joss, S., Clayton-Smith, J.,  
478 Parker, M. J., Louw, J. J., Gewillig, M., Breckpot, J., Kraus, A., Sasaki, E., Kini, U.,  
479 Burgess, T., Tan, T. Y., Armstrong, R., Neas, K., ... Scott, D. A. (2023). Clinical exome  
480 sequencing efficacy and phenotypic expansions involving anomalous pulmonary venous  
481 return. *European Journal of Human Genetics: EJHG*, 31(12), 1430–1439.  
482 <https://doi.org/10.1038/s41431-023-01451-4>
- 483 Janik, E., Niemcewicz, M., Podogrocki, M., Ceremuga, M., Stela, M., & Bijak, M. (2021). T-2  
484 Toxin—The Most Toxic Trichothecene Mycotoxin: Metabolism, Toxicity, and

- 485 Decontamination Strategies. *Molecules*, 26(22), 6868.  
486 <https://doi.org/10.3390/molecules26226868>
- 487 Knorr, A. G., Schmidt, C., Tesina, P., Berninghausen, O., Becker, T., Beatrix, B., & Beckmann, R.  
488 (2019). Ribosome-NatA architecture reveals that rRNA expansion segments coordinate  
489 N-terminal acetylation. *Nature Structural & Molecular Biology*, 26(1), 35–39.  
490 <https://doi.org/10.1038/s41594-018-0165-y>
- 491 Kuhns, K. J., Zhang, G., Wang, Z., & Liu, W. (2018). ARD1/NAA10 acetylation in prostate  
492 cancer. *Experimental & Molecular Medicine*, 50(7), 1–8. [https://doi.org/10.1038/s12276-](https://doi.org/10.1038/s12276-018-0107-0)  
493 [018-0107-0](https://doi.org/10.1038/s12276-018-0107-0)
- 494 Le, M.-K., Vuong, H. G., Nguyen, T. T. T., & Kondo, T. (2023). NAA10 overexpression dictates  
495 distinct epigenetic, genetic, and clinicopathological characteristics in adult gliomas.  
496 *Journal of Neuropathology and Experimental Neurology*, 82(7), 650–658.  
497 <https://doi.org/10.1093/jnen/nlad037>
- 498 Liszczak, G., Goldberg, J. M., Foy, H., Petersson, E. J., Arnesen, T., & Marmorstein, R. (2013).  
499 Molecular Basis for Amino-Terminal Acetylation by the Heterodimeric NatA Complex.  
500 *Nature Structural & Molecular Biology*, 20(9), 1098–1105.  
501 <https://doi.org/10.1038/nsmb.2636>
- 502 Lu, Q.-Z., Li, X., Ouyang, J., Li, J.-Q., & Chen, G. (2019). Further application of hyperbaric  
503 oxygen in prostate cancer. *Medical Gas Research*, 8(4), 167–171.  
504 <https://doi.org/10.4103/2045-9912.248268>
- 505 Lyon, G. J., & O’Rawe, J. (2015). Human Genetics and Clinical Aspects of Neurodevelopmental  
506 Disorders. In K. J. Mitchell (Ed.), *The Genetics of Neurodevelopmental Disorders* (1st  
507 ed., pp. 289–318). Wiley. <https://doi.org/10.1002/9781118524947>
- 508 Lyon, G. J., Vedaie, M., Beisheim, T., Park, A., Marchi, E., Gottlieb, L., Hsieh, T.-C.,  
509 Klinkhammer, H., Sandomirsky, K., Cheng, H., Starr, L. J., Preddy, I., Tseng, M., Li, Q.,  
510 Hu, Y., Wang, K., Carvalho, A., Martinez, F., Caro-Llopis, A., ... Herr-Israel, E. (2023).

- 511 Expanding the phenotypic spectrum of NAA10-related neurodevelopmental syndrome  
512 and NAA15-related neurodevelopmental syndrome. *European Journal of Human*  
513 *Genetics: EJHG*, 31(7), 824–833. <https://doi.org/10.1038/s41431-023-01368-y>
- 514 Makwana, R., Christ, C., Marchi, E., Harpell, R., & Lyon, G. J. (2024). Longitudinal adaptive  
515 behavioral outcomes in Ogden syndrome by seizure status and therapeutic intervention.  
516 *American Journal of Medical Genetics Part A*, e63651.  
517 <https://doi.org/10.1002/ajmg.a.63651>
- 518 Markova, N. (2019). Dysbiotic microbiota in autistic children and their mothers: Persistence of  
519 fungal and bacterial wall-deficient L-form variants in blood. *Scientific Reports*, 9(1),  
520 13401. <https://doi.org/10.1038/s41598-019-49768-9>
- 521 Martínez-Cerdeño, V. (2017). Dendrite and spine modifications in autism and related  
522 neurodevelopmental disorders in patients and animal models. *Developmental*  
523 *Neurobiology*, 77(4), 393–404. <https://doi.org/10.1002/dneu.22417>
- 524 McTiernan, N., Støve, S. I., Aukrust, I., Mårli, M. T., Myklebust, L. M., Houge, G., & Arnesen, T.  
525 (2018). NAA10 dysfunction with normal NatA-complex activity in a girl with non-  
526 syndromic ID and a de novo NAA10 p.(V111G) variant—A case report. *BMC Medical*  
527 *Genetics*, 19(1), 47. <https://doi.org/10.1186/s12881-018-0559-z>
- 528 Milazzo, C., Mientjes, E. J., Wallaard, I., Rasmussen, S. V., Erichsen, K. D., Kakunuri, T., van  
529 der Sman, A. S. E., Kremer, T., Miller, M. T., Hoener, M. C., & Elgersma, Y. (2021).  
530 Antisense oligonucleotide treatment rescues UBE3A expression and multiple  
531 phenotypes of an Angelman syndrome mouse model. *JCI Insight*, 6(15), e145991.  
532 <https://doi.org/10.1172/jci.insight.145991>
- 533 Monestier, O., Landemaine, A., Bugeon, J., Rescan, P.-Y., & Gabillard, J.-C. (2019). Naa15  
534 knockdown enhances c2c12 myoblast fusion and induces defects in zebrafish myotome  
535 morphogenesis. *Comparative Biochemistry and Physiology. Part B, Biochemistry &*  
536 *Molecular Biology*, 228, 61–67. <https://doi.org/10.1016/j.cbpb.2018.11.005>



- 537 Myklebust, L. M., Van Damme, P., Støve, S. I., Dörfel, M. J., Abboud, A., Kalvik, T. V., Grauffel,  
538 C., Jonckheere, V., Wu, Y., Swensen, J., Kaasa, H., Liszczak, G., Marmorstein, R.,  
539 Reuter, N., Lyon, G. J., Gevaert, K., & Arnesen, T. (2015). Biochemical and cellular  
540 analysis of Ogden syndrome reveals downstream Nt-acetylation defects. *Human*  
541 *Molecular Genetics*, *24*(7), 1956–1976. <https://doi.org/10.1093/hmg/ddu611>
- 542 Nickels, K. C., Zaccariello, M. J., Hamiwka, L. D., & Wirrell, E. C. (2016). Cognitive and  
543 neurodevelopmental comorbidities in paediatric epilepsy. *Nature Reviews Neurology*,  
544 *12*(8), 465–476. <https://doi.org/10.1038/nrneurol.2016.98>
- 545 Novak, S., Drenjancevic, I., Vukovic, R., Kellermayer, Z., Cosic, A., Tolusic Levak, M., Balogh,  
546 P., Culo, F., & Mihalj, M. (2016). Anti-Inflammatory Effects of Hyperbaric Oxygenation  
547 during DSS-Induced Colitis in BALB/c Mice Include Changes in Gene Expression of HIF-  
548 1 $\alpha$ , Proinflammatory Cytokines, and Antioxidative Enzymes. *Mediators of Inflammation*,  
549 *2016*, 7141430. <https://doi.org/10.1155/2016/7141430>
- 550 Ohkawa, N., Sugisaki, S., Tokunaga, E., Fujitani, K., Hayasaka, T., Setou, M., & Inokuchi, K.  
551 (2008). N-acetyltransferase ARD1-NAT1 regulates neuronal dendritic development.  
552 *Genes to Cells*, *13*(11), 1171–1183. <https://doi.org/10.1111/j.1365-2443.2008.01235.x>
- 553 Ortega, M. A., Fraile-Martinez, O., García-Montero, C., Callejón-Peláez, E., Sáez, M. A.,  
554 Álvarez-Mon, M. A., García-Honduvilla, N., Monserrat, J., Álvarez-Mon, M., Bujan, J., &  
555 Canals, M. L. (2021). A General Overview on the Hyperbaric Oxygen Therapy:  
556 Applications, Mechanisms and Translational Opportunities. *Medicina*, *57*(9), 864.  
557 <https://doi.org/10.3390/medicina57090864>
- 558 Palmieri, M., Pozzer, D., & Landsberger, N. (2023). Advanced genetic therapies for the  
559 treatment of Rett syndrome: State of the art and future perspectives. *Frontiers in*  
560 *Neuroscience*, *17*, 1172805. <https://doi.org/10.3389/fnins.2023.1172805>
- 561 Park, E. C., & Szostak, J. W. (1992). ARD1 and NAT1 proteins form a complex that has N-  
562 terminal acetyltransferase activity. *The EMBO Journal*, *11*(6), 2087–2093.



- 563 Patel, R., Park, A. Y., Marchi, E., Gropman, A. L., Whitehead, M. T., & Lyon, G. J. (2024).  
564 Ophthalmic Manifestations of NAA10-Related and NAA15-Related Neurodevelopmental  
565 Syndrome: Analysis of Cortical Visual Impairment and Refractive Errors. *medRxiv: The*  
566 *Preprint Server for Health Sciences*, 2024.02.01.24302161.  
567 <https://doi.org/10.1101/2024.02.01.24302161>
- 568 Perry, A., Flanagan, H. E., Dunn Geier, J., & Freeman, N. L. (2009). Brief report: The Vineland  
569 Adaptive Behavior Scales in young children with autism spectrum disorders at different  
570 cognitive levels. *Journal of Autism and Developmental Disorders*, 39(7), 1066–1078.  
571 <https://doi.org/10.1007/s10803-009-0704-9>
- 572 Pesz, K., Pienkowski, V. M., Pollak, A., Gasperowicz, P., Sykulski, M., Kosińska, J., Kiszko, M.,  
573 Krzykwa, B., Bartnik-Głaska, M., Nowakowska, B., Rydzanicz, M., Sasiadek, M. M., &  
574 Płoski, R. (2018). Phenotypic consequences of gene disruption by a balanced de novo  
575 translocation involving SLC6A1 and NAA15. *European Journal of Medical Genetics*,  
576 61(10), 596–601. <https://doi.org/10.1016/j.ejmg.2018.03.013>
- 577 Peyre, H., Peries, M., Madieu, E., David, A., Picot, M.-C., Pickles, A., & Baghdadli, A. (2024).  
578 Association of difficulties in motor skills with longitudinal changes in social skills in  
579 children with autism spectrum disorder: Findings from the ELENA French Cohort.  
580 *European Child & Adolescent Psychiatry*. <https://doi.org/10.1007/s00787-023-02324-3>
- 581 Protic, D., Salcedo-Arellano, M. J., Dy, J. B., Potter, L. A., & Hagerman, R. J. (2019). New  
582 Targeted Treatments for Fragile X Syndrome. *Current Pediatric Reviews*, 15(4), 251–  
583 258. <https://doi.org/10.2174/1573396315666190625110748>
- 584 Raditha, C., Handryastuti, S., Pusponegoro, H. D., & Mangunatmadja, I. (2023). Positive  
585 behavioral effect of sensory integration intervention in young children with autism  
586 spectrum disorder. *Pediatric Research*, 93(6), 1667–1671.  
587 <https://doi.org/10.1038/s41390-022-02277-4>

- 588 Resanovic, I., Gluvic, Z., Zaric, B., Sudar-Milovanovic, E., Jovanovic, A., Milacic, D., Isakovic,  
589 R., & Isenovic, E. R. (2019). Early Effects of Hyperbaric Oxygen on Inducible Nitric  
590 Oxide Synthase Activity/Expression in Lymphocytes of Type 1 Diabetes Patients: A  
591 Prospective Pilot Study. *International Journal of Endocrinology*, 2019, 2328505.  
592 <https://doi.org/10.1155/2019/2328505>
- 593 Ritter, A., Berger, J. H., Deardorff, M., Izumi, K., Lin, K. Y., Medne, L., & Ahrens-Nicklas, R. C.  
594 (2021). Variants in NAA15 cause pediatric hypertrophic cardiomyopathy. *American*  
595 *Journal of Medical Genetics. Part A*, 185(1), 228–233.  
596 <https://doi.org/10.1002/ajmg.a.61928>
- 597 Rogers, J. P., Pollak, T. A., Blackman, G., & David, A. S. (2019). Catatonia and the immune  
598 system: A review. *The Lancet. Psychiatry*, 6(7), 620–630. [https://doi.org/10.1016/S2215-](https://doi.org/10.1016/S2215-0366(19)30190-7)  
599 [0366\(19\)30190-7](https://doi.org/10.1016/S2215-0366(19)30190-7)
- 600 Sampanthavivat, M., Singkhwa, W., Chaiyakul, T., Karoonyawanich, S., & Ajpru, H. (2012).  
601 Hyperbaric oxygen in the treatment of childhood autism: A randomised controlled trial.  
602 *Diving and Hyperbaric Medicine*, 42(3), 128–133.
- 603 Sidhu, M., Brady, L., Tarnopolsky, M., & Ronen, G. M. (2017). Clinical Manifestations Associated  
604 With the N-Terminal-Acetyltransferase NAA10 Gene Mutation in a Girl: Ogden  
605 Syndrome. *Pediatric Neurology*, 76, 82–85.  
606 <https://doi.org/10.1016/j.pediatrneurol.2017.07.010>
- 607 Stessman, H. A. F., Xiong, B., Coe, B. P., Wang, T., Hoekzema, K., Fenckova, M., Kvarnung, M.,  
608 Gerds, J., Trinh, S., Cosemans, N., Vives, L., Lin, J., Turner, T. N., Santen, G.,  
609 Ruivenkamp, C., Kriek, M., van Haeringen, A., Aten, E., Friend, K., ... Eichler, E. E.  
610 (2017). Targeted sequencing identifies 91 neurodevelopmental-disorder risk genes with  
611 autism and developmental-disability biases. *Nature Genetics*, 49(4), 515–526.  
612 <https://doi.org/10.1038/ng.3792>

- 613 Steward, R., Crane, L., Mairi Roy, E., Remington, A., & Pellicano, E. (2018). “Life is Much More  
614 Difficult to Manage During Periods”: Autistic Experiences of Menstruation. *Journal of*  
615 *Autism and Developmental Disorders*, 48(12), 4287–4292.  
616 <https://doi.org/10.1007/s10803-018-3664-0>
- 617 Støve, S. I., Blenski, M., Stray-Pedersen, A., Wierenga, K. J., Jhangiani, S. N., Akdemir, Z. C.,  
618 Crawford, D., McTiernan, N., Myklebust, L. M., Purcarin, G., McNall-Knapp, R., Wadley,  
619 A., Belmont, J. W., Kim, J. J., Lupski, J. R., & Arnesen, T. (2018). A novel NAA10 variant  
620 with impaired acetyltransferase activity causes developmental delay, intellectual  
621 disability, and hypertrophic cardiomyopathy. *European Journal of Human Genetics:*  
622 *EJHG*, 26(9), 1294–1305. <https://doi.org/10.1038/s41431-018-0136-0>
- 623 Straka, I., Švantnerová, J., Minár, M., Stanková, S., & Zech, M. (2022). Neurodevelopmental  
624 Gene-Related Dystonia-Parkinsonism with Onset in Adults: A Case with NAA15 Variant.  
625 *Movement Disorders*, 37(9), 1955–1957. <https://doi.org/10.1002/mds.29125>
- 626 Tager-Flusberg, H., & Kasari, C. (2013). Minimally Verbal School-Aged Children with Autism  
627 Spectrum Disorder: The Neglected End of the Spectrum. *Autism Research* □: *Official*  
628 *Journal of the International Society for Autism Research*, 6(6), 10.1002/aur.1329.  
629 <https://doi.org/10.1002/aur.1329>
- 630 Thews, O., & Vaupel, P. (2015). Spatial oxygenation profiles in tumors during normo- and  
631 hyperbaric hyperoxia. *Strahlentherapie Und Onkologie: Organ Der Deutschen*  
632 *Rontgengesellschaft ... [et Al]*, 191(11), 875–882. [https://doi.org/10.1007/s00066-015-](https://doi.org/10.1007/s00066-015-0867-6)  
633 [0867-6](https://doi.org/10.1007/s00066-015-0867-6)
- 634 Tian, Y., Xie, H., Yang, S., Shangguan, S., Wang, J., Jin, C., Zhang, Y., Cui, X., Lyu, Y., Chen,  
635 X., & Wang, L. (2022). Possible Catch-Up Developmental Trajectories for Children with  
636 Mild Developmental Delay Caused by NAA15 Pathogenic Variants. *Genes*, 13(3), 536.  
637 <https://doi.org/10.3390/genes13030536>

- 638 Umlai, U.-K. I., Haris, B., Hussain, K., & Jithesh, P. V. (2021). Case Report: Phenotype-Gene  
639 Correlation in a Case of Novel Tandem 4q Microduplication With Short Stature, Speech  
640 Delay and Microcephaly. *Frontiers in Endocrinology*, *12*, 783235.  
641 <https://doi.org/10.3389/fendo.2021.783235>
- 642 Van Damme, P. (2021). Charting the N-Terminal Acetylome: A Comprehensive Map of Human  
643 NatA Substrates. *International Journal of Molecular Sciences*, *22*(19), 10692.  
644 <https://doi.org/10.3390/ijms221910692>
- 645 Van Damme, P., Evjenth, R., Foyen, H., Demeyer, K., De Bock, P.-J., Lillehaug, J. R.,  
646 Vandekerckhove, J., Arnesen, T., & Gevaert, K. (2011). Proteome-derived Peptide  
647 Libraries Allow Detailed Analysis of the Substrate Specificities of N $\alpha$ -acetyltransferases  
648 and Point to hNaa10p as the Post-translational Actin N $\alpha$ -acetyltransferase. *Molecular &*  
649 *Cellular Proteomics*: MCP, *10*(5), M110.004580.  
650 <https://doi.org/10.1074/mcp.M110.004580>
- 651 Ward, T., Tai, W., Morton, S., Impens, F., Van Damme, P., Van Haver, D., Timmerman, E.,  
652 Venturini, G., Zhang, K., Jang, M. Y., Willcox, J. A. L., Haghighi, A., Gelb, B. D., Chung,  
653 W. K., Goldmuntz, E., Porter, G. A., Lifton, R. P., Brueckner, M., Yost, H. J., ... Seidman,  
654 J. G. (2021). Mechanisms of Congenital Heart Disease Caused by NAA15  
655 Haploinsufficiency. *Circulation Research*, *128*(8), 1156–1169.  
656 <https://doi.org/10.1161/CIRCRESAHA.120.316966>
- 657 Weidenhausen, J., Kopp, J., Armbruster, L., Wirtz, M., Lapouge, K., & Sinning, I. (2021).  
658 Structural and functional characterization of the N-terminal acetyltransferase Naa50.  
659 *Structure (London, England: 1993)*, *29*(5), 413-425.e5.  
660 <https://doi.org/10.1016/j.str.2020.12.004>
- 661 Wong, W.-R., Brugman, K. I., Maher, S., Oh, J. Y., Howe, K., Kato, M., & Sternberg, P. W.  
662 (2019). Autism-associated missense genetic variants impact locomotion and

- 663 neurodevelopment in *Caenorhabditis elegans*. *Human Molecular Genetics*, 28(13),  
664 2271–2281. <https://doi.org/10.1093/hmg/ddz051>
- 665 Wu, Y., & Lyon, G. J. (2018). NAA10-related syndrome. *Experimental & Molecular Medicine*,  
666 50(7), 1–10. <https://doi.org/10.1038/s12276-018-0098-x>
- 667 Ye, W., Liu, T., Zhang, W., & Zhang, W. (2021). The Toxic Mechanism of Gliotoxins and  
668 Biosynthetic Strategies for Toxicity Prevention. *International Journal of Molecular  
669 Sciences*, 22(24), 13510. <https://doi.org/10.3390/ijms222413510>
- 670 Yubero, D., Martorell, L., Nunes, T., Lyon, G. J., & Ortigoza-Escobar, J. D. (2022).  
671 Neurodevelopmental Gene-Related Dystonia: A Pediatric Case with NAA15 Variant.  
672 *Movement Disorders: Official Journal of the Movement Disorder Society*, 37(11), 2320–  
673 2321. <https://doi.org/10.1002/mds.29241>
- 674 Zhang, Z.-Y., Zhang, J.-L., Zhao, L.-X., Yang, Y., Guo, R., Zhou, N., Liu, Y.-R., & Zheng, G.-P.  
675 (2020). NAA10 promotes proliferation of renal cell carcinoma by upregulating UPK1B.  
676 *European Review for Medical and Pharmacological Sciences*, 24(22), 11553–11560.  
677 [https://doi.org/10.26355/eurrev\\_202011\\_23796](https://doi.org/10.26355/eurrev_202011_23796)
- 678 Zhao, J. J., Halvardson, J., Zander, C. S., Zaghlool, A., Georgii-Hemming, P., Månsson, E.,  
679 Brandberg, G., Sävmarker, H. E., Frykholm, C., Kuchinskaya, E., Thureson, A.-C., &  
680 Feuk, L. (2018). Exome sequencing reveals NAA15 and PUF60 as candidate genes  
681 associated with intellectual disability. *American Journal of Medical Genetics. Part B,  
682 Neuropsychiatric Genetics: The Official Publication of the International Society of  
683 Psychiatric Genetics*, 177(1), 10–20. <https://doi.org/10.1002/ajmg.b.32574>
- 684 Zhou, B., Liu, L., & Liu, B. (2016). Neuroprotection of hyperbaric oxygen therapy in sub-acute  
685 traumatic brain injury: Not by immediately improving cerebral oxygen saturation and  
686 oxygen partial pressure. *Neural Regeneration Research*, 11(9), 1445–1449.  
687 <https://doi.org/10.4103/1673-5374.191218>

688 Zhu, R., Chen, M., Luo, Y., Cheng, H., Zhao, Z., & Zhang, M. (2024). The role of N-  
689 acetyltransferases in cancers. *Gene*, 892, 147866.  
690 <https://doi.org/10.1016/j.gene.2023.147866>  
691

692 **Tables:**

693 **Table 1. NAA15 Pathogenic Variant Breakdown by Sex**

| <b>Pathogenic Variant</b>        | <b>Males</b> | <b>Females</b> |
|----------------------------------|--------------|----------------|
| p.Arg27Gly                       | 1            |                |
| p.His80Argfs*17                  | 2            |                |
| p.Trp83X                         |              | 1              |
| p.Asn113Ser                      |              | 1              |
| p.Glu173*                        | 1            |                |
| p.Glu173NfsX54                   | 1            |                |
| p.Tyr333*                        | 1            |                |
| p.Asp335Glufs*7                  | 1            |                |
| p.Asn362MetfsX36                 |              | 1              |
| p.Cys484Arg                      | 1            |                |
| p.Arg549X                        | 1            |                |
| p.Ala585Thr                      | 1            |                |
| p.Gln621*                        | 1            |                |
| p.Asn623Ilefs*                   | 1            |                |
| p.Lys628Glu                      | 1            |                |
| p.Ala678Cysfs*3                  | 1            |                |
| p.Tyr682*                        |              | 1              |
| p.Ala719Thr                      | 1            |                |
| p.Arg782X                        |              | 1              |
| p.Ile796Thr                      | 1            |                |
| p.Asn864Ser                      |              | 1              |
| c.0692-1G>T (intronic)           | 1            |                |
| c.139+2T>A: IVS2+2T>A (intronic) |              | 1              |
| c.1087+2T>C (intronic)           |              | 1              |
| c.1753+1G>A (splice site)        | 1            |                |
| c.2057-2A>G (splice site)        |              | 1              |
| <b>Total: 27</b>                 | <b>18</b>    | <b>9</b>       |

694

695

696 **Table 2. Vineland ABC and Domain Standard Scores by Sex**

|                       | <b>Communication</b> | <b>Daily Living Skills</b> | <b>Social</b> | <b>Motor</b> | <b>ABC Standard</b> |
|-----------------------|----------------------|----------------------------|---------------|--------------|---------------------|
| <b>Total Average</b>  | <b>64.1</b>          | <b>70.2</b>                | <b>72.7</b>   | <b>71.1</b>  | <b>68.5</b>         |
| SD                    | 26.7                 | 21.1                       | 23.9          | 17.5         | 22.1                |
| <b>Female Average</b> | <b>70.0</b>          | <b>75.4</b>                | <b>78.2</b>   | <b>83.2</b>  | <b>74.9</b>         |
| SD                    | 28.4                 | 22.9                       | 23.8          | 11.6         | 24.4                |
| <b>Male Average</b>   | <b>60.9</b>          | <b>67.4</b>                | <b>69.6</b>   | <b>63.9</b>  | <b>65.0</b>         |
| SD                    | 25.1                 | 19.5                       | 23.3          | 16.4         | 20.0                |
| <b>t test</b>         | <b>0.27</b>          | <b>0.22</b>                | <b>0.24</b>   | <b>0.01*</b> | <b>0.15</b>         |

697 \*Asterisk denotes significance (p<.05)

698

699

700

701

702 **Table 3. Correlation Coefficients of Vineland Domain Standard Scores vs Age**

|                                                      | <b>Communication</b> | <b>Daily Living Skills</b> | <b>Social</b> | <b>Motor</b> | <b>ABC</b> |
|------------------------------------------------------|----------------------|----------------------------|---------------|--------------|------------|
| Female Correlation Coefficient                       | -0.49                | -0.58                      | -0.46         | -0.71        | -0.51      |
| Male Correlation Coefficient                         | -0.15                | -0.27                      | -0.31         | 0.15         | -0.28      |
| Male Correlation Coefficient excluding ID: NAA15-010 | 0.35                 | 0.49                       | 0.26          | 0.15         | 0.38       |

703



704 **Table 4. Vineland Sub-Domain Standard Scores by Domain and Sex**

|                | Communication Sub-Domain |             |             | Daily Living Skills Sub-Domain |              |             |
|----------------|--------------------------|-------------|-------------|--------------------------------|--------------|-------------|
|                | Receptive                | Expressive  | Written     | Personal                       | Domestic     | Community   |
| <b>Total</b>   | <b>8.46</b>              | <b>8.46</b> | <b>9.26</b> | <b>8.75</b>                    | <b>10.60</b> | <b>8.88</b> |
| <b>Average</b> |                          |             |             |                                |              |             |
| SD             | 4.79                     | 5.41        | 5.09        | 5.17                           | 3.60         | 3.60        |
| <b>Female</b>  | <b>10.18</b>             | <b>9.06</b> | <b>9.07</b> | <b>10.35</b>                   | <b>11.21</b> | <b>8.50</b> |
| <b>Average</b> |                          |             |             |                                |              |             |
| SD             | 4.62                     | 5.79        | 5.61        | 5.27                           | 4.02         | 3.46        |
| <b>Male</b>    | <b>7.52</b>              | <b>8.13</b> | <b>9.34</b> | <b>7.87</b>                    | <b>10.31</b> | <b>9.07</b> |
| <b>Average</b> |                          |             |             |                                |              |             |
| SD             | 4.61                     | 5.17        | 4.82        | 4.90                           | 3.33         | 3.66        |
| <b>t-test</b>  | <b>0.07</b>              | <b>0.58</b> | <b>0.87</b> | <b>0.12</b>                    | <b>0.45</b>  | <b>0.64</b> |

705

|                | Socialization Sub-Domain |                  |              | Motor Sub-Domain |               | Maladaptive Trait Sub-Domain |               |
|----------------|--------------------------|------------------|--------------|------------------|---------------|------------------------------|---------------|
|                | Interpersonal Relations  | Play and Leisure | Coping       | Gross Motor      | Fine Motor    | Internalizing                | Externalizing |
| <b>Total</b>   |                          |                  |              |                  |               |                              |               |
| <b>Average</b> | <b>9.54</b>              | <b>9.48</b>      | <b>10.85</b> | <b>9.25</b>      | <b>9.88</b>   | <b>18.30</b>                 | <b>17.00</b>  |
| SD             | 5.04                     | 5.19             | 3.41         | 3.59             | 4.27          | 3.64                         | 3.11          |
| <b>Female</b>  |                          |                  |              |                  |               |                              |               |
| <b>Average</b> | <b>10.47</b>             | <b>10.35</b>     | <b>11.27</b> | <b>10.44</b>     | <b>13.33</b>  | <b>18.27</b>                 | <b>16.18</b>  |
| SD             | 5.61                     | 5.05             | 3.19         | 2.22             | 3.53          | 2.99                         | 2.48          |
| <b>Male</b>    |                          |                  |              |                  |               |                              |               |
| <b>Average</b> | <b>9.03</b>              | <b>9.00</b>      | <b>10.65</b> | <b>8.53</b>      | <b>7.80</b>   | <b>18.32</b>                 | <b>17.47</b>  |
| SD             | 4.62                     | 5.20             | 3.49         | 4.03             | 3.19          | 3.97                         | 3.33          |
| <b>t-test</b>  | <b>0.36</b>              | <b>0.40</b>      | <b>0.57</b>  | <b>0.22</b>      | <b>0.001*</b> | <b>0.98</b>                  | <b>0.29</b>   |

706 \*Asterisk denotes significance ( $p < .05$ ) between Male and Female scores

707

708

709 **Table 5. Correlation Coefficients of Vineland Sub-Domain Standard Scores vs Age**

|                                      | Communication Sub-Domain |            |         | Daily Living Skills Sub-Domain |          |           |
|--------------------------------------|--------------------------|------------|---------|--------------------------------|----------|-----------|
|                                      | Receptive                | Expressive | Written | Personal                       | Domestic | Community |
| Female Correlation Coefficient       | -0.49                    | -0.33      | -0.41   | -0.43                          | -0.50    | -0.28     |
| Male Correlation Coefficient         | -0.07                    | -0.06      | -0.41   | 0.07                           | -0.68    | -0.39     |
| Male Correlation excluding NAA15-010 | 0.39                     | 0.40       | -0.04   | 0.54                           | -0.15    | 0.22      |

710

|                                      | Socialization Sub-Domain |                  |        | Motor Sub-Domain |            |
|--------------------------------------|--------------------------|------------------|--------|------------------|------------|
|                                      | Interpersonal Relations  | Play and Leisure | Coping | Gross Motor      | Fine Motor |
| Female Correlation Coefficient       | -0.19                    | -0.45            | -0.57  | -0.38            | -0.82      |
| Male Correlation Coefficient         | -0.17                    | -0.17            | -0.50  | -0.10            | -0.14      |
| Male Correlation Excluding NAA15-010 | 0.31                     | 0.27             | 0.04   | -0.10            | -0.14      |

711

|                                      | Maladaptive Trait Sub-Domain |               |
|--------------------------------------|------------------------------|---------------|
|                                      | Internalizing                | Externalizing |
| Female Correlation Coefficient       | 0.62                         | 0.25          |
| Male Correlation Coefficient         | 0.44                         | 0.39          |
| Male Correlation Excluding NAA15-010 | 0.43                         | -0.27         |

716

717 **Table 6. Comparison of Vineland Adaptive Behavior Categories by Sex per Domain**

|                 | Communication |        | Daily Living Skills |        | Socialization |        | Motor |        | ABC  |        |
|-----------------|---------------|--------|---------------------|--------|---------------|--------|-------|--------|------|--------|
|                 | Male          | Female | Male                | Female | Male          | Female | Male  | Female | Male | Female |
| Moderately High | 0             | 0      | 0                   | 0      | 0             | 0      | 0     | 0      | 0    | 1      |
| Adequate        | 3             | 4      | 5                   | 6      | 8             | 5      | 1     | 4      | 4    | 4      |
| Moderately Low  | 13            | 2      | 11                  | 4      | 10            | 7      | 5     | 4      | 11   | 2      |
| Low             | 12            | 10     | 13                  | 7      | 10            | 5      | 9     | 1      | 13   | 10     |
| $\chi^2$        | 0.06          |        | 0.42                |        | 0.92          |        | 0.02* |        | 0.11 |        |

718 \*Asterisk denotes significance ( $p < .05$ ) between Male and Female scores

719

720

721

722 **Figures:**

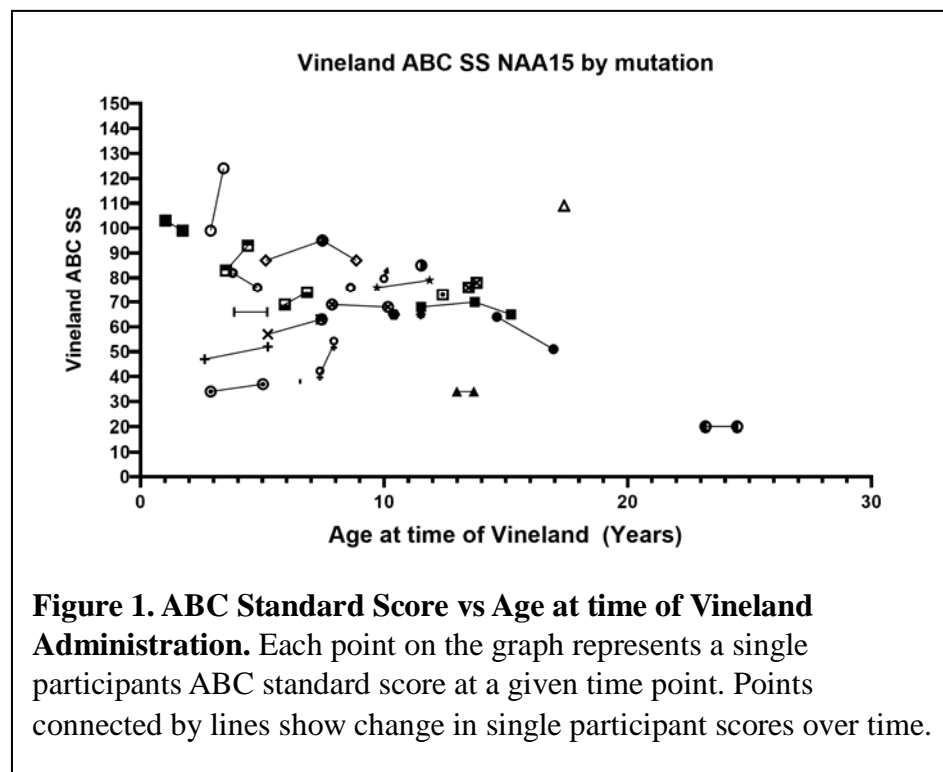

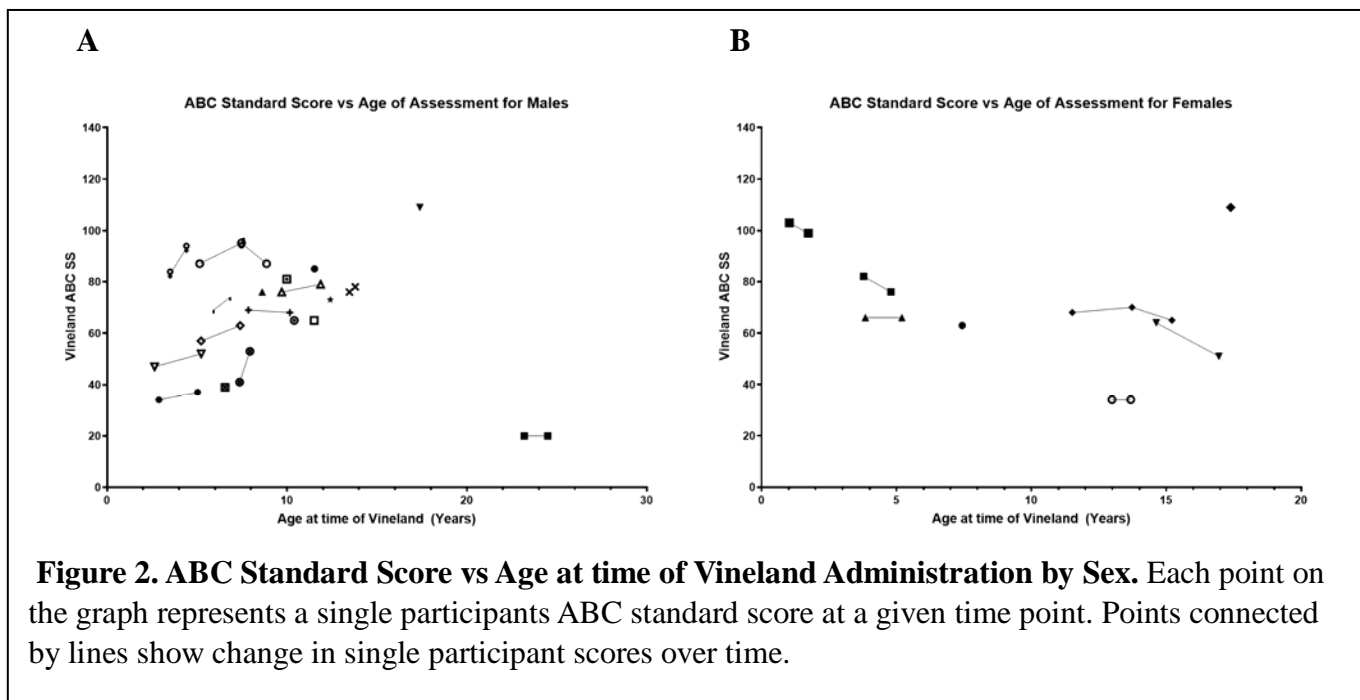

725

726

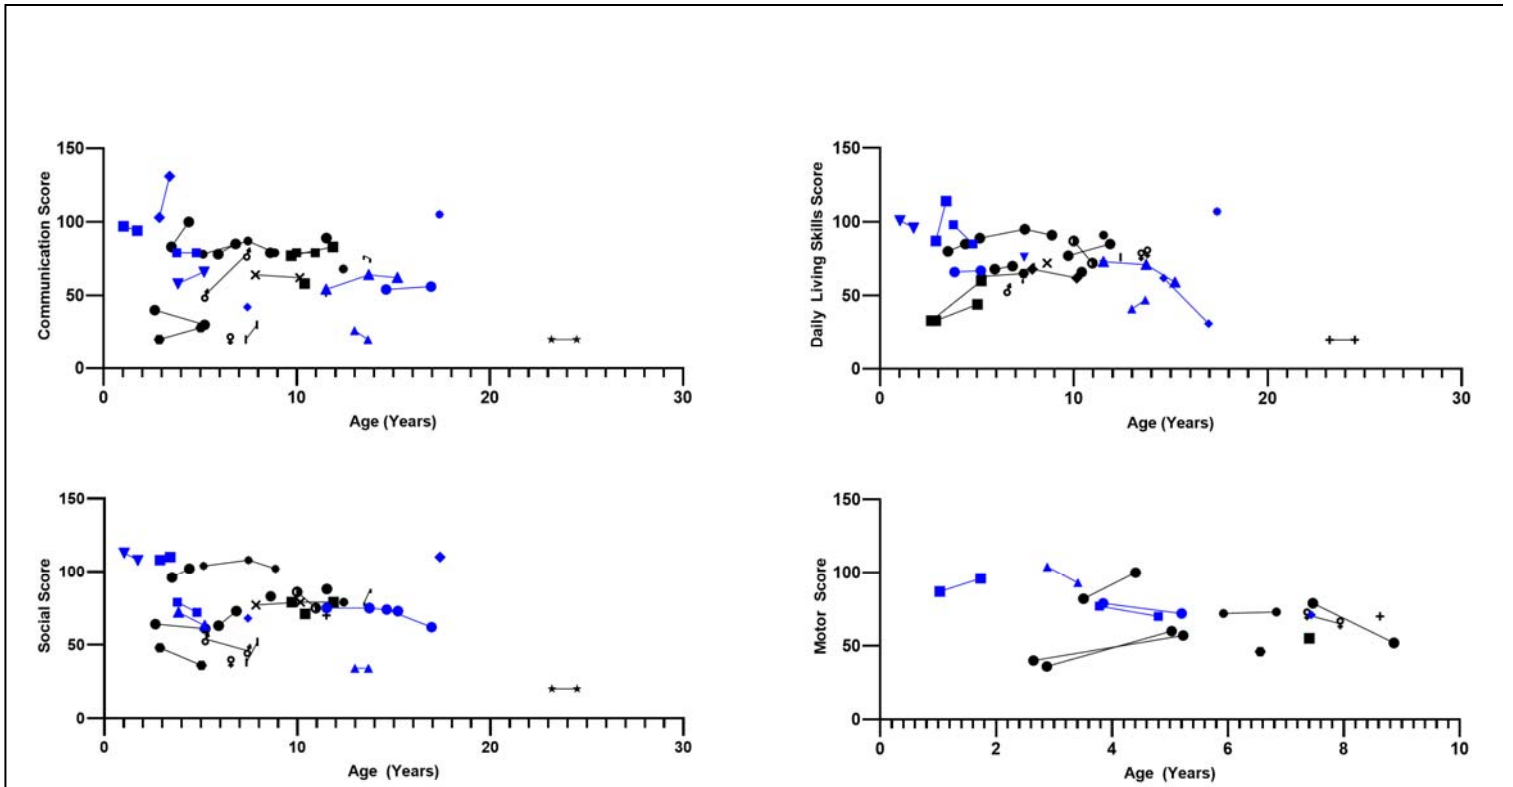

**Figure 3. Vineland Domain Score vs Age at time of Vineland Assessment.** Points in black represent Males. Points in Pink represent Females. Each point on the graph represents a single participants Vineland Domain standard score at a given time point. Points connected by lines show change in single participant scores over time.

727

728

729

730

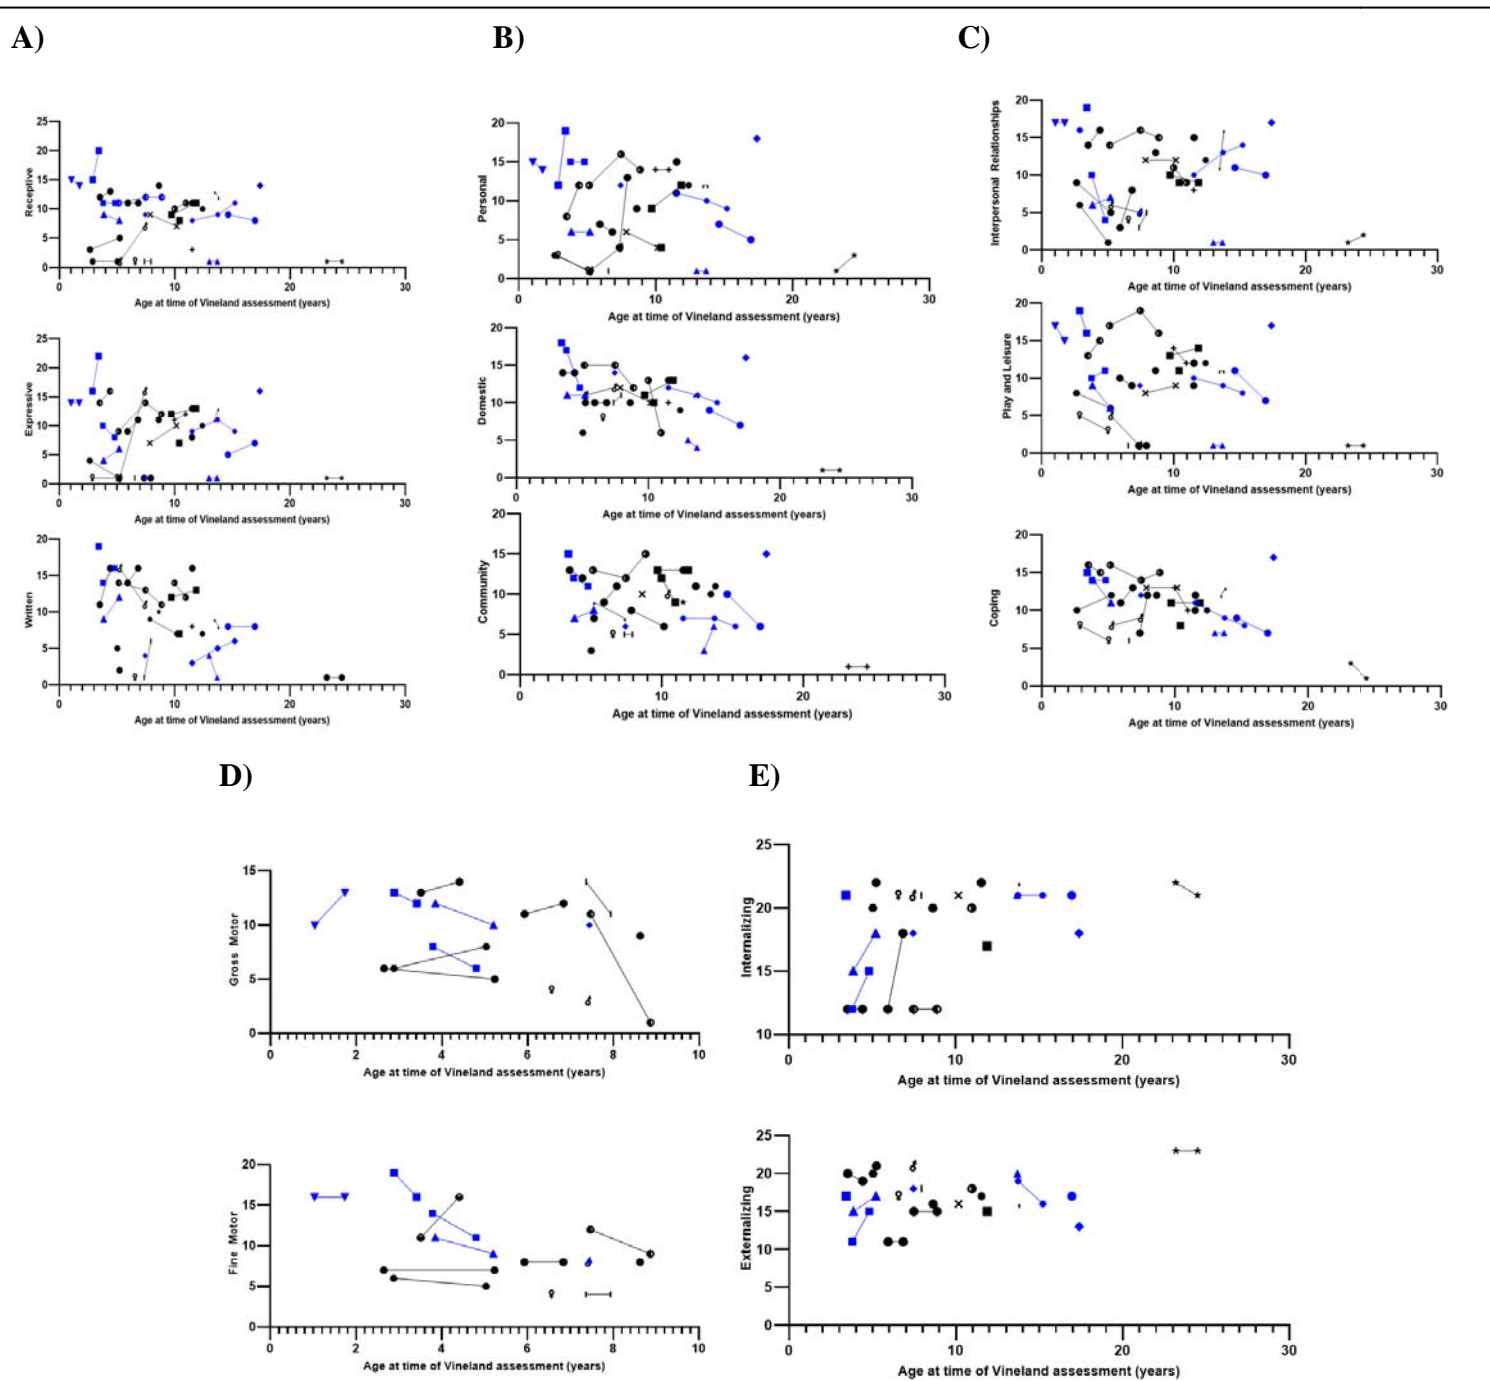

**Figure 4. Vineland Sub-Domain Score vs Age at time of Assessment.** A) Communication Sub-Domain Standard Scores. B) Daily Living Skills Sub-Domain Standard Scores. C) Socialization Sub-Domain Standard Scores. D) Motor Sub-Domain Standard Scores E) Maladaptive Trait Standard Scores. Points in black represent Males. Points in Blue represent Females. Each point on the graph represents a single participant's sub-domain standard score at a given time point. Points connected by lines show change in single participant scores over time.
